# Supplementary material for: A dual-functional MOF for high proton conduction and sensitive detection of ascorbic acid
Source: Royal Society of Chemistry journal article supplement (doi:10.1039/d0dt02834g), 2020-01-01
Supplement: d0dt02834g1.pdf [file d0dt02834g1.pdf]

# **A Dual-Function MOF for High Proton Conduction and Sensitive Detection of Ascorbic Acid**

*Shu-Fang Zhou,<sup>a</sup> Biao-Biao Hao,<sup>a</sup> Tian Lin,<sup>a</sup> Chen-Xi Zhang<sup>\*ab</sup> and Qing-Lun  
Wang<sup>\*cd</sup>*

a College of Chemical Engineering and Materials Science, Tianjin University of  
Science and Technology, Tianjin 300457, P. R. China

b Key Laboratory of Brine Chemical Engineering and Resource Eco-utilization,  
Tianjin University of Science and Technology, Tianjin 300457, P. R. China

c Key Laboratory of Advanced Energy Materials Chemistry (Ministry of Education),  
Nan kai University, Tianjin 300071, P. R. China

d College of Chemistry, Nan kai University, Tianjin 300071, P. R. China

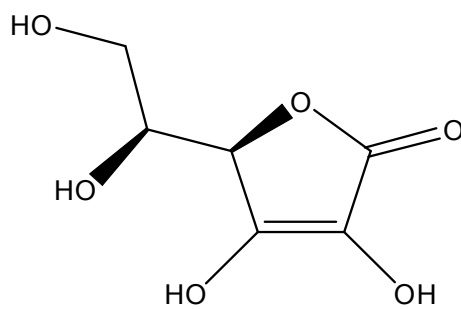

**Scheme S1.** Molecular structure of Ascorbic Acid (AA)

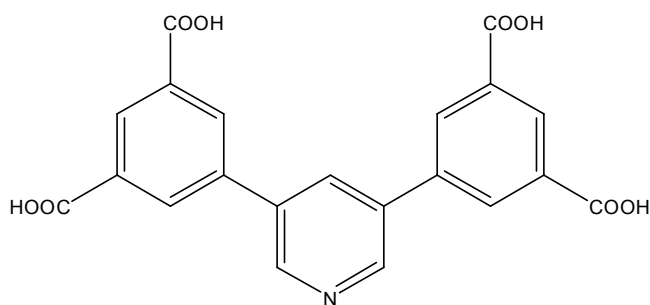

**Scheme S2.** Molecular structure of H<sub>4</sub>BDPP

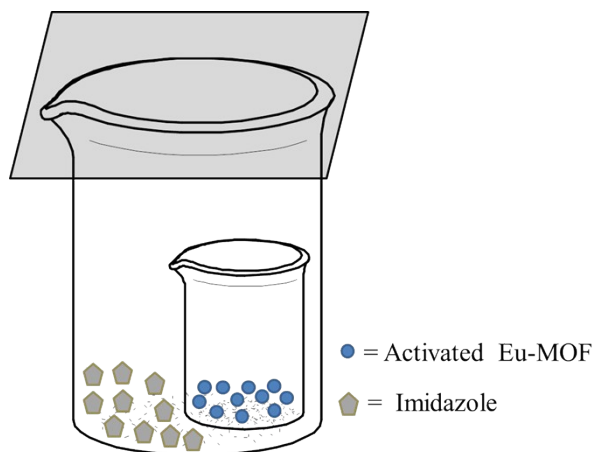

**Scheme S3.** Schematic for encapsulating imidazole molecules into Eu-MOF via vaporization method.

**Table S1.** Crystal data and structure refinement for Eu-MOF

| complex                                                      | Eu-MOF                                                                         |
|--------------------------------------------------------------|--------------------------------------------------------------------------------|
| Formula                                                      | C <sub>47</sub> H <sub>41</sub> Eu <sub>2</sub> N <sub>4</sub> O <sub>23</sub> |
| <i>Mr</i>                                                    | 1333.76                                                                        |
| T/K                                                          | 155(40)                                                                        |
| Crystal system                                               | monoclinic                                                                     |
| Space group                                                  | P2 <sub>1</sub> /c                                                             |
| <i>a</i> / Å                                                 | 15.1205(6)                                                                     |
| <i>b</i> / Å                                                 | 10.7089(7)                                                                     |
| <i>c</i> / Å                                                 | 15.3715(10)                                                                    |
| $\alpha$ / °                                                 | 90                                                                             |
| $\beta$ / °                                                  | 95.057                                                                         |
| $\gamma$ / °                                                 | 90                                                                             |
| <i>Z</i>                                                     | 2                                                                              |
| Volume / Å <sup>3</sup>                                      | 2479.3(2)                                                                      |
| $\rho$ / g cm <sup>-3</sup>                                  | 1.787                                                                          |
| $\mu$ / mm <sup>-1</sup>                                     | 2.597                                                                          |
| <i>F</i> (000)                                               | 1322.0                                                                         |
| Crystal size / mm <sup>3</sup>                               | 0.20×0.18×0.12                                                                 |
| $2\theta$ / °                                                | 6.178 to 50.018                                                                |
| Reflections/ unique                                          | 15750/4361                                                                     |
| <i>R</i> <sub>(int)</sub>                                    | 0.1084                                                                         |
| Data / restraints / parameters                               | 4361/84/357                                                                    |
| GOF on <i>F</i> <sup>2</sup>                                 | 1.098                                                                          |
| <i>R</i> <sub>1</sub> [ <i>I</i> >2 $\delta$ ( <i>I</i> )]   | 0.0648                                                                         |
| w <i>R</i> <sub>2</sub> [ <i>I</i> >2 $\delta$ ( <i>I</i> )] | 0.1539                                                                         |
| <i>R</i> <sub>1</sub> (all data)                             | 0.0904                                                                         |
| w <i>R</i> <sub>2</sub> (all data)                           | 0.1848                                                                         |

**Table S2.** Selected Bond Lengths (Å) and angles (°) of Eu-MOF

| Eu-MOF              |           |                     |            |
|---------------------|-----------|---------------------|------------|
| Eu(4)- Eu(4)#1      | 4.0437(8) | Eu(4)-O(1)#2        | 2.641(6)   |
| Eu(4)-O(9)          | 2.459(6)  | Eu(4)-O(1)#3        | 2.366(6)   |
| Eu(4)-O(22)         | 2.368(6)  | Eu(4)-O(2)#2        | 2.454(7)   |
| Eu(4)-O(24)         | 2.518(6)  | O(1)-Eu(4)#6        | 2.641(6)   |
| Eu(4)-O(29)         | 2.451(6)  | O(1)-Eu(4)#7        | 2.366(6)   |
| Eu(4)-O(44)         | 2.450(7)  | O(2)-Eu(4)#6        | 2.454(7)   |
| Eu(4)-O(51)         | 2.457(7)  |                     |            |
| O(9)-Eu(4)-Eu(4)#1  | 66.23(14) | O(44)-Eu(4)-O(51)   | 71.7(3)    |
| O(22)-Eu(4)-Eu(4)#1 | 68.41(15) | O(51)-Eu(4)-Eu(4)#1 | 114.47(18) |
| O(9)-Eu(4)-O(24)    | 68.89(19) | O(44)-Eu(4)-O(2)#2  | 76.9(2)    |
| O(22)-Eu(4)-O(9)    | 133.2(2)  | O(51)-Eu(4)-O(9)    | 138.6(3)   |

|                     |            |                      |           |
|---------------------|------------|----------------------|-----------|
| O(9)-Eu(4)-O(1)#2   | 71.8(2)    | O(44)-Eu(4)-O(1)#2   | 114.5(2)  |
| O(22)-Eu(4)-O(24)   | 143.2(2)   | O(51)-Eu(4)-O(24)    | 72.7(2)   |
| O(22)-Eu(4)-O(29)   | 146.0(2)   | O(51)-Eu(4)-O(1)#2   | 136.3(2)  |
| O(22)-Eu(4)-O(44)   | 78.9(2)    | O(1)#2-Eu(4)-Eu(4)#1 | 33.90(14) |
| O(22)-Eu(4)-O(51)   | 72.3(2)    | O(1)#3-Eu(4)-Eu(4)#1 | 38.51(14) |
| O(22)-Eu(4)-O2#2    | 91.2(2)    | O(1)#3-Eu(4)-O(22)   | 78.6(2)   |
| O(29)-Eu(4)- O(9)   | 74.5(2)    | O(1)#3-Eu(4)-O(51)   | 84.3(2)   |
| O(29)-Eu(4)-O(51)   | 99.8(2)    | O(1)#3-Eu(4)-O(2)#2  | 121.5(2)  |
| O(44)-Eu(4)- O(9)   | 135.6(2)   | O(2)#2-Eu(4)-O(51)   | 146.7(3)  |
| O(29)-Eu(4)-O(1)#2  | 123.0(2)   | O(2)#2-Eu(4)-Eu(4)#1 | 84.05(13) |
| O(29)-Eu(4)-O(2)#2  | 77.5(2)    | O(2)#2-Eu(4)-O(9)    | 73.3(2)   |
| O(22)-Eu(4)-O(1)#2  | 67.3(2)    | O(1)#3-Eu(4)-O(9)    | 73.3(2)   |
| O(24)-Eu(4)-O(1)#2  | 139.3(2)   | O(1)#3-Eu(4)-O(29)   | 134.5(2)  |
| O(44)-Eu(4)- O(24)  | 100.7(2)   | O(2)#2-Eu(4)-O(1)#2  | 51.16(19) |
| O(44)-Eu(4)- O(29)  | 67.4(2)    | Eu(4)#7-O1-Eu(4)#6   | 107.6(2)  |
| O(29) -Eu(4)- O(24) | 52.7(2)    | O(1)#3-Eu(4)-O(1)#2  | 72.4(2)   |
| O(22)-Eu(4)-Eu(4)#1 | 117.58(16) | O(1)#3-Eu(4)-O(24)   | 86.8(2)   |
| O(29)-Eu(4)-Eu(4)#1 | 139.94(16) | O(1)#3-Eu(4)-O(44)   | 151.1(2)  |
| O(44)-Eu(4)-Eu(4)#1 | 141.56(15) | O(2)#2-Eu(4)-O(24)   | 124.8(2)  |

Symmetry Codes: #1 = -X, 2-Y, 1-Z; #2 = -X, 1/2+Y, 1/2-Z; #3 = +X, 3/2-Y, 1/2+Z; #4 = 1-X, -1/2+Y, 1/2-Z; #5 = 1-X, 1/2+Y, 1/2-Z; #6 = -X, -1/2+Y, 1/2-Z; #7 = +X, 3/2-Y, -1/2+Z

**Table S3.** Comparison of the proton conductivity values of Im@Eu-MOF with other proton conducting materials containing guest molecules.

| Materials                                                                                              | Conductivity (S·cm <sup>-1</sup> ) | Conditions    | References |
|--------------------------------------------------------------------------------------------------------|------------------------------------|---------------|------------|
| Im@Eu-MOF                                                                                              | 4.53×10 <sup>-4</sup>              | 348 K, 98% RH | This work  |
| Im-Cu@(NENU-3a)                                                                                        | 3.16×10 <sup>-4</sup>              | 70°C, 90% RH  | 40         |
| Im@Td-PPI                                                                                              | 9.04×10 <sup>-5</sup>              | 90°C          | 39         |
| Im@Td-PNDI                                                                                             | 3.49×10 <sup>-4</sup>              | 90°C          | 39         |
| polyPtC-Im                                                                                             | 1.5×10 <sup>-5</sup>               | 120°C         | 21         |
| [Zn(HPO <sub>4</sub> )(H <sub>2</sub> PO <sub>4</sub> ) <sub>2</sub> ](ImH <sub>2</sub> ) <sub>2</sub> | 2.6×10 <sup>-4</sup>               | 130°C         | 41         |
| Im@[Al(μ <sub>2</sub> -OH)(1,4-ndc)]                                                                   | 2.2×10 <sup>-5</sup>               | 120°C         | 34         |
| Im@[Al(μ <sub>2</sub> -OH)(1,4-bdc)]                                                                   | 1.0×10 <sup>-7</sup>               | 120°C         | 34         |
| OFc Im                                                                                                 | 2.4×10 <sup>-5</sup>               | 120°C         | 42         |

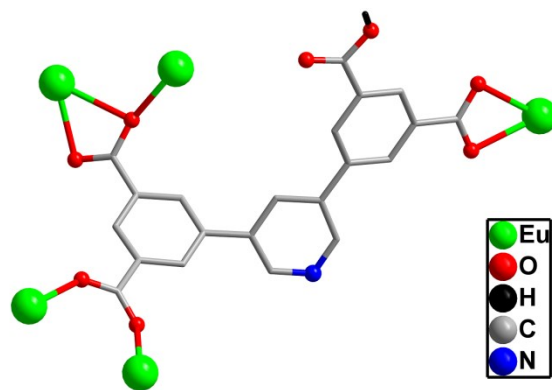

Figure S1. Coordination mode of the ligand in Eu-MOF

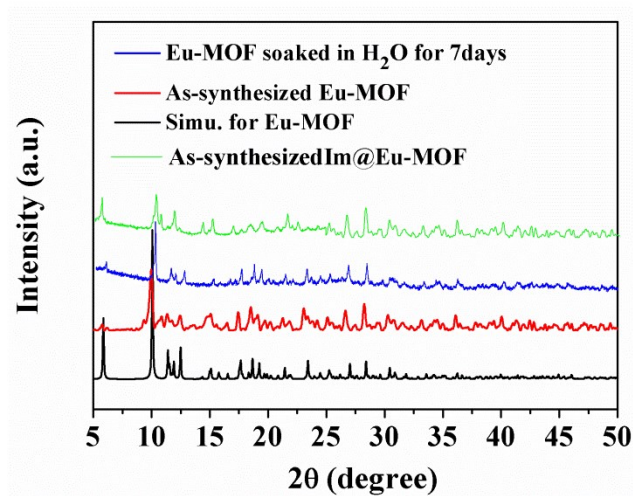

Figure S2. PXRD spectra of Eu-MOF in different states and experimental PXRD profiles of Im@Eu-MOF

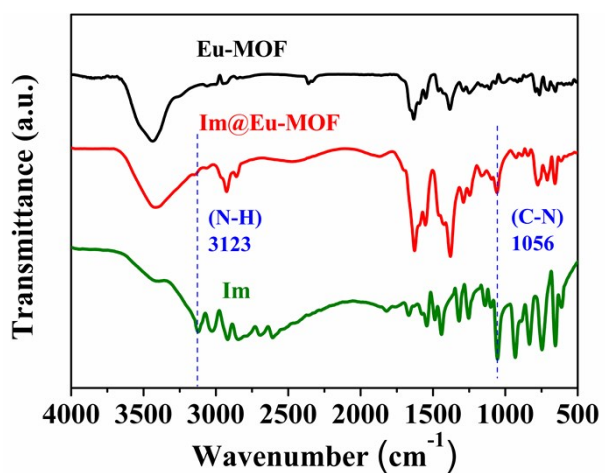

Figure S3. FT-IR spectra of Eu-MOF, Im@Eu-MOF and imidazole

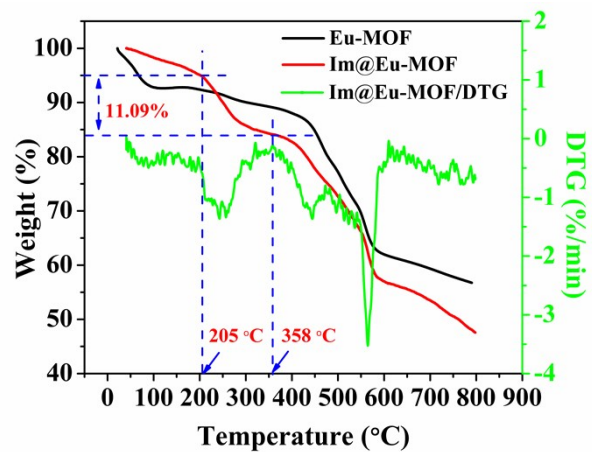

Figure S4. The TGA and DTG of Eu-MOF and Im@Eu-MOF

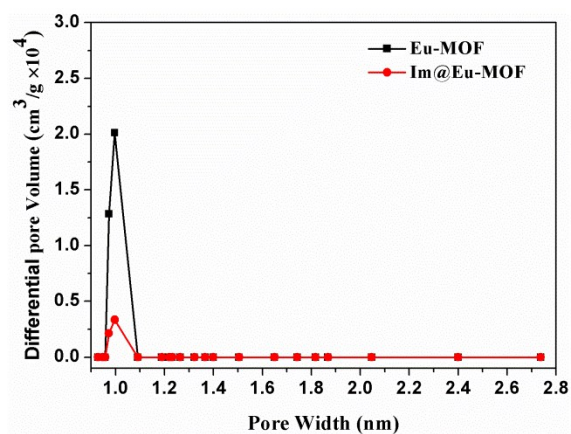

Figure S5. pore size distribution profiles for Eu-MOF and Im@Eu-MOF

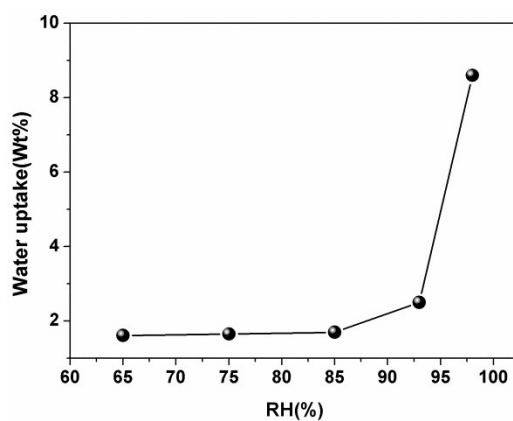

Figure S6. Water uptake capacities of Im@Eu-MOF.

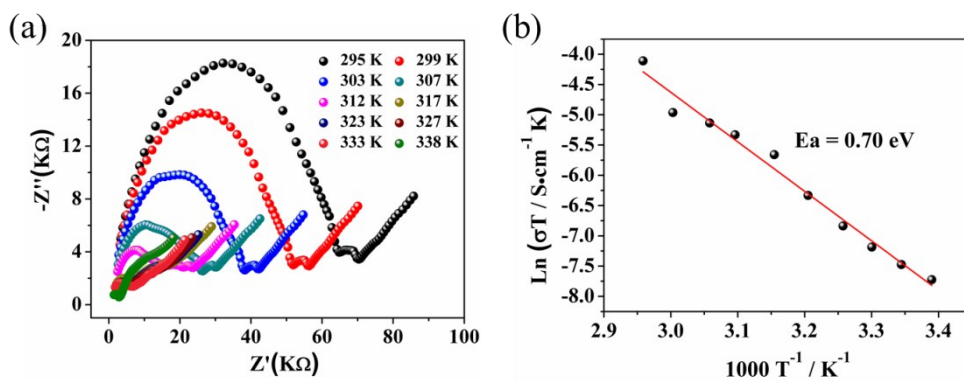

**Figure S7.** (a) Nyquist plots of Eu-MOF at different temperature and 98% RH; (b) Arrhenius plot of  $\ln(\sigma T)$  against  $1000/T$  of Eu-MOF under 98% RH (the black solid line represents the best fit of data).

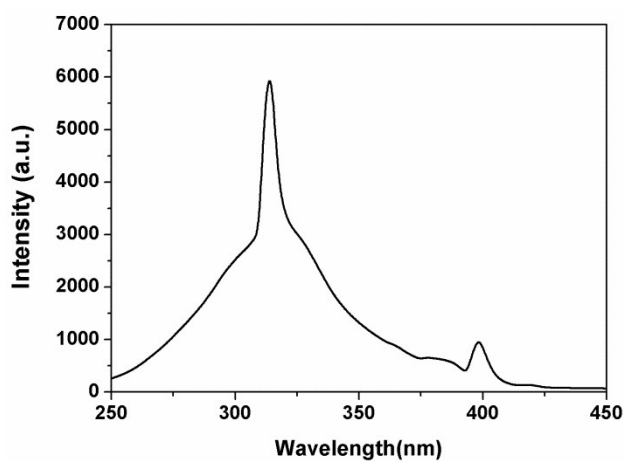

**Figure S8.** Excitation spectrum of Eu-MOF

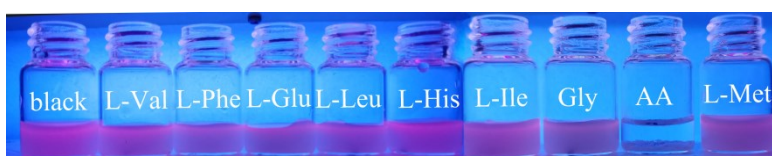

**Figure S9.** Image of Eu-MOF suspension in water after the addition of various analytes under irradiation of 254 nm UV light

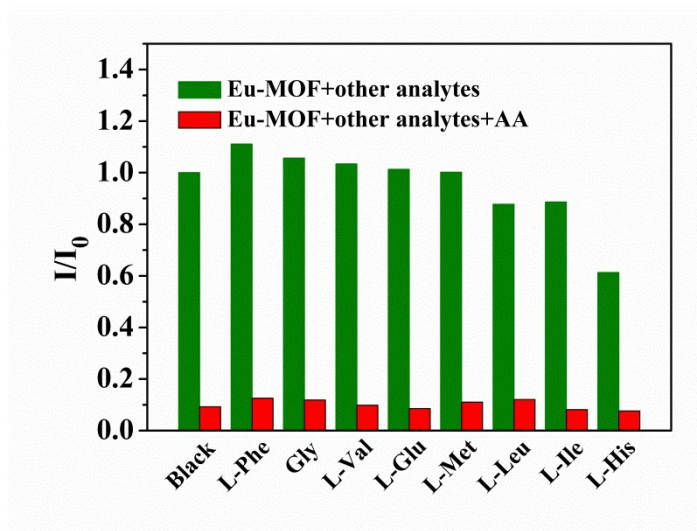

**Figure S10.** Fluorescence intensity ratio histograms of Eu-MOF with the dropping of different analytes (green) and subsequent dropping of AA with the concentration of  $10^{-2}$  mol L<sup>-1</sup> (red) .

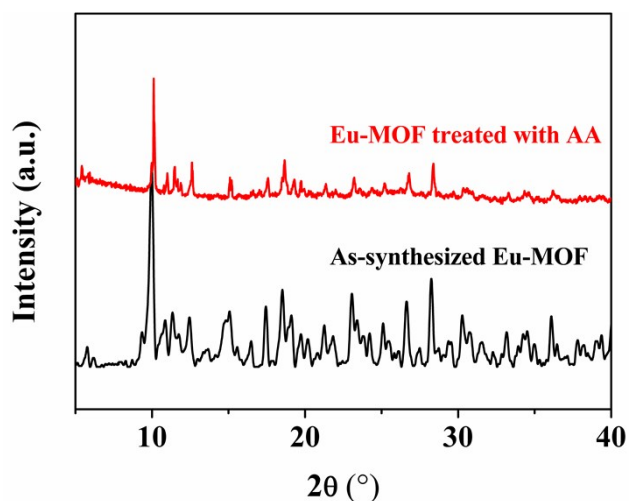

**Figure S11.** The PXRD of Eu-MOF after soaking in AA aqueous solution

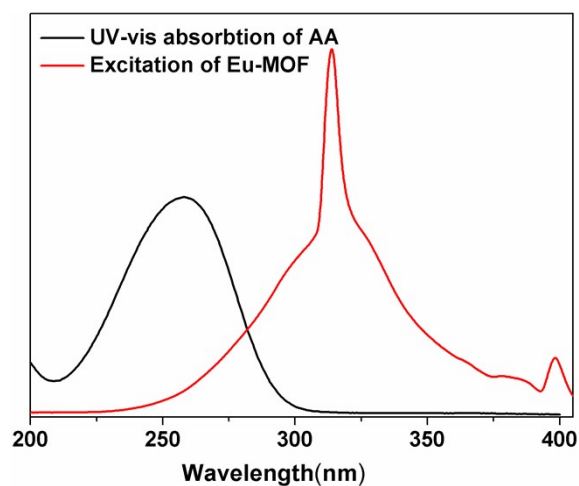

**Figure S12.** The excitation spectra of Eu-MOF and the UV-vis absorption spectra of AA.
